# Supplementary material for: Presence of cancer-associated mutations in exhaled breath condensates of healthy individuals by next generation sequencing
Source: PubMed Central journal article supplement (PMC5392316; doi:10.18632/oncotarget.15233), 2017-02-09
Supplement: oncotarget-08-18166-s001.pdf [file oncotarget-08-18166-s001.pdf]

## Presence of cancer-associated mutations in exhaled breath condensates of healthy individuals by next generation sequencing

### SUPPLEMENTARY TABLE

Supplementary Table 1: Exhaled breath condensate (EBC) volumes, DNA amounts isolated, and sequencing data details from 20 healthy individuals studied for mutations in EBC by next generation sequencing

| Sample         | Sample volume (ml) | Total DNA (ng) | % Reads on target | Mean depth   | Uniformity     |
|----------------|--------------------|----------------|-------------------|--------------|----------------|
| EBC 1          | 3.5                | 42             | 96.94 %           | 1337         | 97.16 %        |
| EBC 2a*        | 3.9                | 52.2           | 94.86 %           | 355.3        | 89.66 %        |
| EBC 2b*        | 3.6                | 60.6           | 89.58 %           | 1679         | 92.06 %        |
| EBC 3          | 1.8                | 63.6           | 87.25 %           | 1051         | 90.21 %        |
| EBC 4          | 3.5                | 74.1           | 77.56 %           | 437.2        | 69.71 %        |
| EBC 5          | 2.8                | 44.8           | 74.03 %           | 173.2        | 78.14 %        |
| EBC 6          | 2                  | 110.3          | 84.48 %           | 307.9        | 81.09 %        |
| EBC 7          | 2.6                | 104.7          | 90.15 %           | 1963         | 90.83 %        |
| EBC 8          | 4                  | 46.6           | 96.80 %           | 2153         | 98.31 %        |
| EBC 9          | 2.4                | 74.55          | 82.48 %           | 557.4        | 92.79 %        |
| EBC 10         | 3.5                | 39.9           | 90.31 %           | 1216         | 99.26 %        |
| EBC 11         | 3.74               | 36.8           | 73.99 %           | 948.2        | 89.29 %        |
| EBC 12         | 3.59               | 67.9           | 72.53 %           | 918.4        | 86.38 %        |
| EBC 13         | 3.58               | 82.3           | 74.64 %           | 303          | 81.76 %        |
| EBC 14         | 3.33               | 102.6          | 80.23 %           | 71.77        | 78.27 %        |
| EBC 15         | 3.2                | 102.6          | 72.44 %           | 186.1        | 67.30 %        |
| EBC 16         | 3.3                | 78.4           | 82.97 %           | 1451         | 88.01 %        |
| EBC 17         | 2.8                | 117.3          | 79.79 %           | 742.9        | 76.82 %        |
| EBC 18         | 3.5                | 124.3          | 79.40 %           | 742          | 72.40 %        |
| EBC 19         | 1.74               | 96.3           | 90.08 %           | 1459         | 98.31 %        |
| EBC 20         | 2.60               | 44.5           | 86.55 %           | 870.1        | 98.31 %        |
| <b>Average</b> | <b>3.1</b>         | <b>74.6</b>    | <b>83.67 %</b>    | <b>901.1</b> | <b>86.48 %</b> |

\*Two different specimens at one month interval
